# Supplementary material for: Machine learning assisted fast prediction of inertial lift in microchannels
Source: Royal Society of Chemistry journal article supplement (doi:10.1039/d1lc00225b), 2021-01-01
Supplement: d1lc00225b1.zip [file d1lc00225b1.zip]

Electronic Supplementary Information (ESI) for Lab on a Chip.  
This journal is © The Royal Society of Chemistry 2021

## Supplementary Information for

### **Machine learning assisted fast prediction of inertial lift in microchannels**

Jinghong Su<sup>1, 2, 4, a</sup>, Xiaodong Chen<sup>3, a</sup>, Yongzheng Zhu<sup>2, 4</sup>, Guoqing Hu<sup>1, \*</sup>

*<sup>1</sup>Department of Engineering Mechanics, State Key Laboratory of Fluid Power and Mechatronic Systems, Zhejiang University, Hangzhou 310027, China*

*<sup>2</sup>The State Key Laboratory of Nonlinear Mechanics (LNM), Institute of Mechanics, Chinese Academy of Sciences, Beijing 100190, China*

*<sup>3</sup>School of Aerospace Engineering, Beijing Institute of Technology, Beijing 100081, China*

*<sup>4</sup>School of Engineering Science, University of Chinese Academy of Sciences, Beijing 100049, China*

*a Equal contribution.*

## MATLAB code

```
clc
clear

%% I. Specify the operating situation
shape= 'semicircular'; % The options include 'rectangular', 'triangular', and 'semicircular'.
AR=2; % Specify channel aspect ratio
Re=50; % Specify channel Reynolds number
kappa=0.3; % Specify particle blockage ratio

k=0;
if strcmp(shape, 'rectangular')
    lateral_y = 0:0.1:(0.9-kappa); % Specify corresponding 2y/H
    lateral_z = 0:0.1:(AR-0.1-kappa); % Specify corresponding 2z/H
    for i=1:length(lateral_y)
        for j=1:length(lateral_z)
            k=k+1;
            Output(:,k)=[AR;Re;kappa;lateral_y(i);lateral_z(j)]./AR;
        end
    end
elseif strcmp(shape, 'semicircular')
    for i=1:1:20 % Specify corresponding 2y/H
        for j=1:1:20 % Specify corresponding 2z/H
            lateral_y=i*0.1;
            lateral_z=(j-1)*0.1;
            if lateral_y^2+lateral_z^2<(2-kappa-0.099)^2 && lateral_y>(kappa+0.099)
                k=k+1;
                Output(:,k)=[Re;kappa;lateral_y-1;lateral_z];
            end
        end
    end
elseif strcmp(shape, 'triangular')
    num=19-kappa/0.05;
    low=-(0.84-(kappa-0.1)/0.05*0.04); % The maximum value of 2y/H
    up=(0.44-(kappa-0.1)/0.05*0.04); % The minimum value of 2y/H
    for i=1:num
        for j=1:num+1-i
            lateral_y=(i-1)*(up-low)/(num-1)+low; % Specify corresponding 2y/H
            lateral_z=(j-1)*(up-lateral_y)/2/(num-i); % Specify corresponding 2z/H
```

```

        if i>num-1
            lateral_z=0;
        end
        k=k+1;
        Output(:,k)=[Re;kappa;lateral_y;lateral_z];
    end
end
else error('Please choose the channel shape');
end

%% II. Import the database
database = importdata(['lift_database_',shape,'.data']);
if strcmp(shape, 'rectangular')
    Input =database(1:5,:);           % Five elements: AR Re kappa 2y/H 2z/H
    Input(5,:) =Input(5,:)/Input(1,:); % Preprocessing of the 2z/H
    Target_CL =database(6:7,:);       % Two elements: CLy and CLz
else
    Input =database(1:4,:);           % Four elements: Re kappa 2y/H 2z/H
    Target_CL =database(5:6,:);       % Two elements: CLy and CLz
end

%% III. 0-1 normalization
[input, ps_input] = mapminmax(Input,0,1);
output = mapminmax('apply',Output,ps_input);
[target_CL, ps_CL] = mapminmax(Target_CL,0,1);

%% IV. Neural Network Training
% 1. Build the network
net_CL = newff(input,target_CL,[20 8],{'tansig' 'tansig' 'purelin'});

% 2. Set training parameters
net_CL.trainParam.epochs = 1000;
net_CL.trainParam.goal = 1e-5;
net_CL.trainParam.mu = 0.001;

% 3. Perform the network
net_CL = train(net_CL,input,target_CL);

%% V Neural Network Prediction
predict_CL = sim(net_CL,output);

%% VI Anti-normalization
Predict_CL = mapminmax('reverse',predict_CL,ps_CL);

```

```

%% VII. Output lift distribution for the operating situation
fp = fopen('lift.data','w+');
fprintf(fp, '%s\n',[shape,' channel']);
fprintf(fp, '%s\t','VARIABLES="2y/H","2z/H","CLy","CLz"');
fprintf(fp, '\n');
if strcmp(shape, 'rectanglar')
    fprintf(fp, '%s\t',['operating situation: ','AR=',num2str(AR),', Re=',num2str(Re),',
kappa=',num2str(kappa, '%.2f')]);
    for i=1:length(Output(1,:))
        fprintf(fp, '\n');
        fprintf(fp, '%5ft',Output(4,i), Output(5,i)*AR,Predict_CL(1,i),Predict_CL(2,i));
    end
else
    fprintf(fp, '%s\t',['operating situation: ','Re=',num2str(Re),',
kappa=',num2str(kappa, '%.2f')]);
    for i=1:length(Output(1,:))
        fprintf(fp, '\n');
        fprintf(fp, '%5ft',Output(3,i), Output(4,i),Predict_CL(1,i),Predict_CL(2,i));
    end
end
fclose(fp);

```



## Mapping procedure

The inertial lift for specified operating conditions was mapped to the cross-section of the microchannel in COMSOL 5.3a by setting the Interpolation option of the user-defined function in the Global Definitions module. Here, the user-defined lift function was obtained by importing the lift data file outputted from MATLAB in the Interpolation option. There are four columns in the lift data file, which correspond to  $2y/H$ ,  $2z/H$ ,  $C_{Ly}$  and  $C_{Lz}$ , respectively. The first column corresponds to the short axis of the rectangular microchannel or the symmetry axis of the triangular microchannel and semicircular microchannel.

As shown in Fig. S2, geometry or orientation of designated microchannels sometimes is not the same as what we simulated, *e.g.*, the curved channel and the oblique straight channel. Therefore, the coordinate transformation should be conducted before the lift forces are mapped. Taking the rectangular microchannel for example, we assume that in a coordinate system  $(x_1, x_2, x_3)$ , the  $x_3$  - axis corresponds to the direction of height while the coordinate of the channel center axis is  $(x_{1\_axis}, x_{2\_axis}, x_{3\_axis})$ . In each  $x_1 - x_2$  plane, we have the values of the center of curvature,  $(x_{1c}, x_{2c})$ , and the medium radius of curvature,  $R$ . Here, the absolute values of  $2(x_3 - x_{3\_axis})/H$  and  $2Rn/H$  correspond to the  $2y/H$  and  $2z/H$ , respectively, where the absolute value of  $Rn$  is the normal distance to the centerline of the channel in each  $x_1 - x_2$  plane, *i.e.*, the normal distance to the short axis within the cross-section. For curved channels, the  $Rn$  can be derived by  $DTocenter - R$ , where  $DTocenter$  is the distance between  $(x_1, x_2)$  and  $(x_{1c}, x_{2c})$  in each  $x_1 - x_2$  plane. For straight channels, the absolute value of  $Rn$  can be derived by calculating the distance between the particle position  $(x_1, x_2)$  and  $(x_{1\_axis}, x_{2\_axis})$ . When the straight channel is horizontally placed, *i.e.*,  $\theta = 0$ , then  $x_{2\_axis} = \text{constant value}$ ,  $x_{1\_axis} = x_1$  and  $Rn = x_2 - x_{2\_axis}$ . When the straight channel is vertically placed, *i.e.*,  $\theta = \pi/2$ , then  $x_{1\_axis} = \text{constant value}$ ,  $x_{2\_axis} = x_2$  and  $Rn = x_1 - x_{1\_axis}$ . Because our outputted inertial lift data from MATLAB are for a quarter of cross-section, we should determine the sign of the lift on the other parts of the cross-section. By taking the formula (c3 - c5) or formula (s2 - s4) into formula (b1 - b3), the lift forces on spherical particles located at arbitrary lateral positions for curved channel or straight channel can finally be derived and accurately mapped onto the cross-section of the designated channel.

The mapping of inertial lift forces on the triangular microchannel and semicircular microchannel can be achieved by similar process.

## Simulated parameters

A wide range of parameters were considered, i.e.,  $Re$  varies from 50 to 200 with an interval of 50, and  $\kappa$  varies from 0.10 to 0.30 with an interval of 0.05. In the square channel,  $2y/H$  and  $2z/H$  varies from 0 to  $1-\kappa$  with an interval of 0.10 near the channel center and 0.05 near the channel wall. Three types of the rectangular channel were simulated with  $AR = 2, 3, \text{ and } 4$ . Herein,  $2y/H$  varies from 0 to  $1-\kappa$  with an interval of 0.10 near the channel center and 0.05 near the channel wall, while  $2z/H$  varies from 0 to  $AR-\kappa$  with an interval of  $0.10AR$  near the channel center and 0.1 near the channel wall. The triangular channel simulated is isosceles and the base of the triangular channel is equal to the height. Herein,  $2y/H$  and  $2z/H$  were chosen based on that the maximum number of the simulated cases along  $y$  and  $z$  direction is  $19-\kappa/0.05$ . For the semicircular channel,  $2y/H$  and  $2z/H$  are chosen with an interval of 0.10 under the limitation of  $2y/H > -1+\kappa$  and  $(2y/H+1)^2+(2z/H)^2 < 2-\kappa$ . The origin of the coordinate axis was set at the center of the symmetry axis of the channel. The Intervals of the parameters allow a systematical and representative investigation for 120 operating conditions. The total number of simulations is close to 15,000.

## Prediction files

The prediction-files.zip includes the machine learning prediction model file and the inertial lift data file that needs to be learned :

lift\_database\_rectangular.data is an input data file that contains the distributions of inertial lift forces in the cross-section of straight rectangular microchannels in a wide parameter space. A total of 8068 cases obtained by direct numerical simulations are included in this data file.

lift\_database\_triangular.data is an input data file that contains the distributions of inertial lift forces in the cross-section of a straight triangular microchannel in a wide parameter space. A total of 2420 cases obtained by direct numerical simulations are included in this data file.

lift\_database\_semicircular.data is an input data file that contains the distributions of inertial lift forces in the cross-section of a straight semicircular microchannel in a wide parameter space. A total of 3672 cases obtained by direct numerical simulations are included in this data file.

BP\_Neural\_Network\_rectangular.m adopts the error backpropagation neural network (BP neural network) to train and predict the inertial lift in three types of microchannels, including the rectangular microchannel, triangular microchannel, and semicircular microchannel. Users can run the BP\_Neural\_Network.m by simply specifying the channel shape (The channel aspect ratio is only for the rectangular microchannel), Reynolds number, and particle blockage ratio. The predicted lift forces will be outputted into lift.data for further use such as Lagrangian particle tracking.

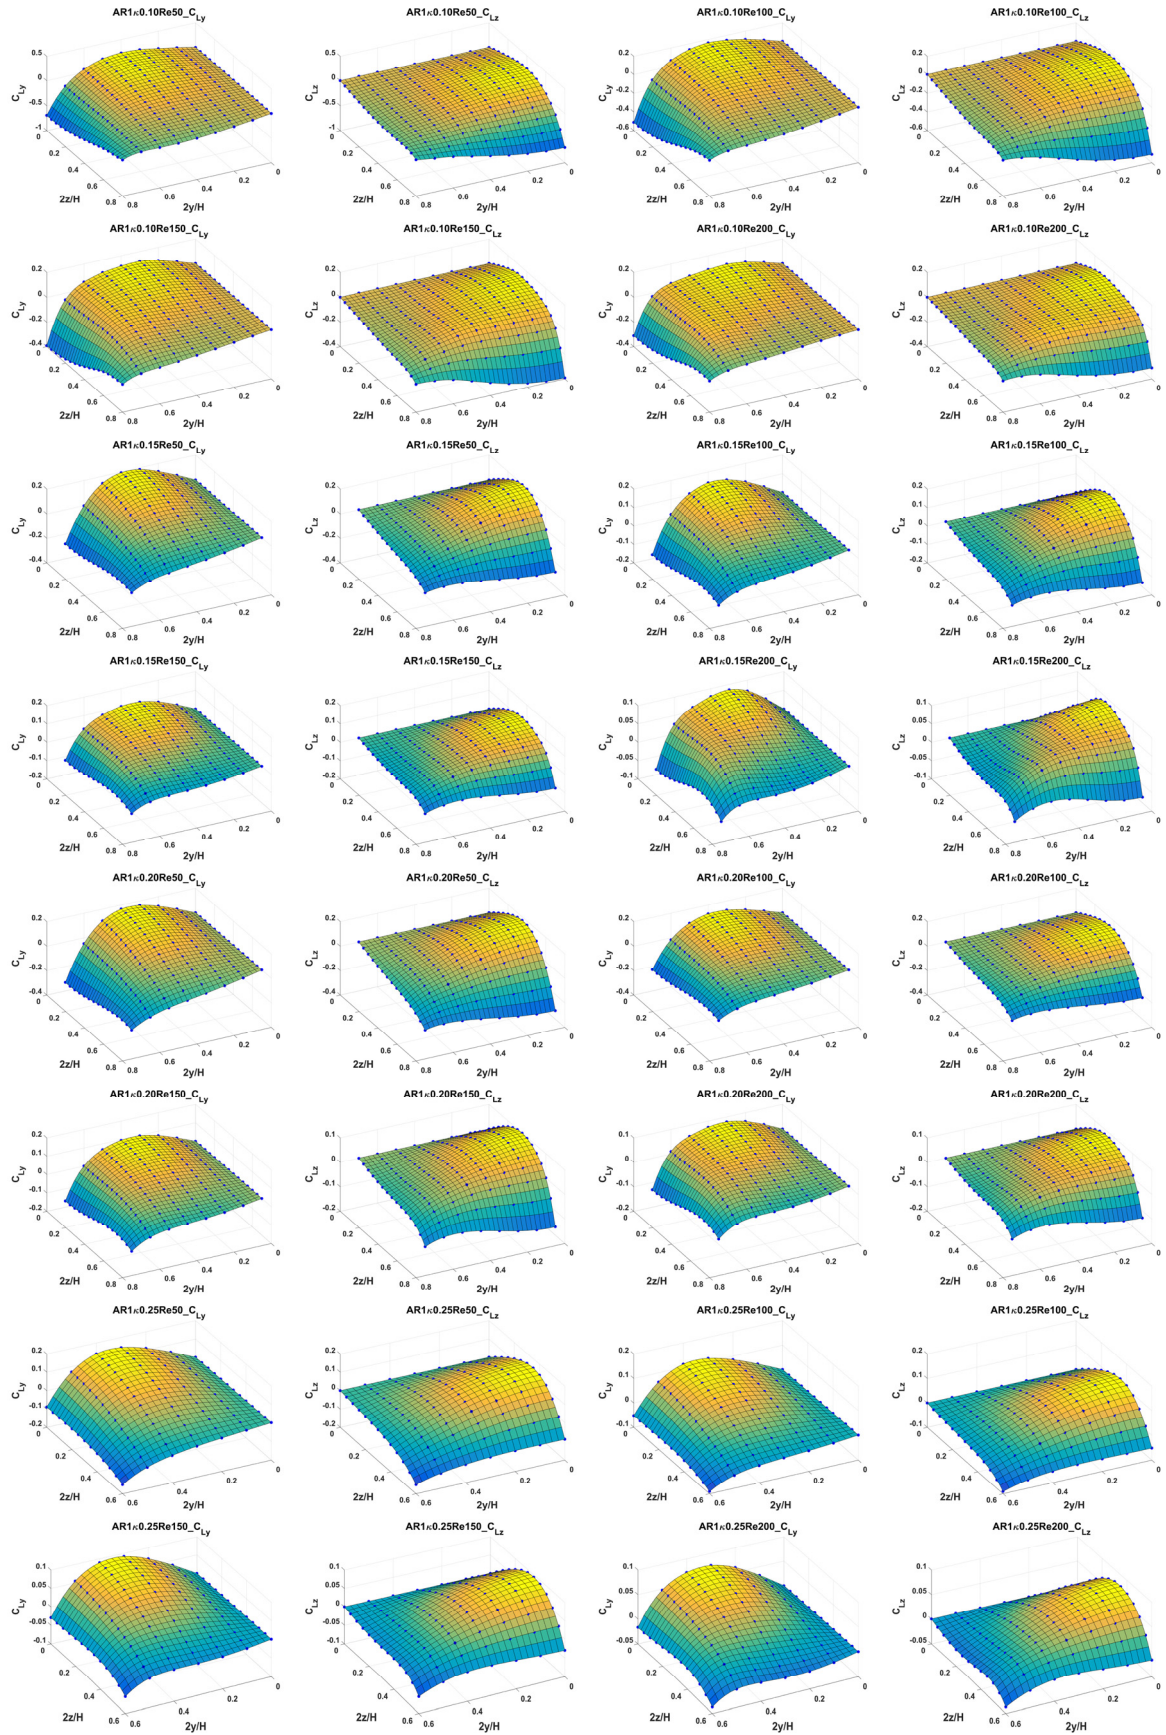

continue



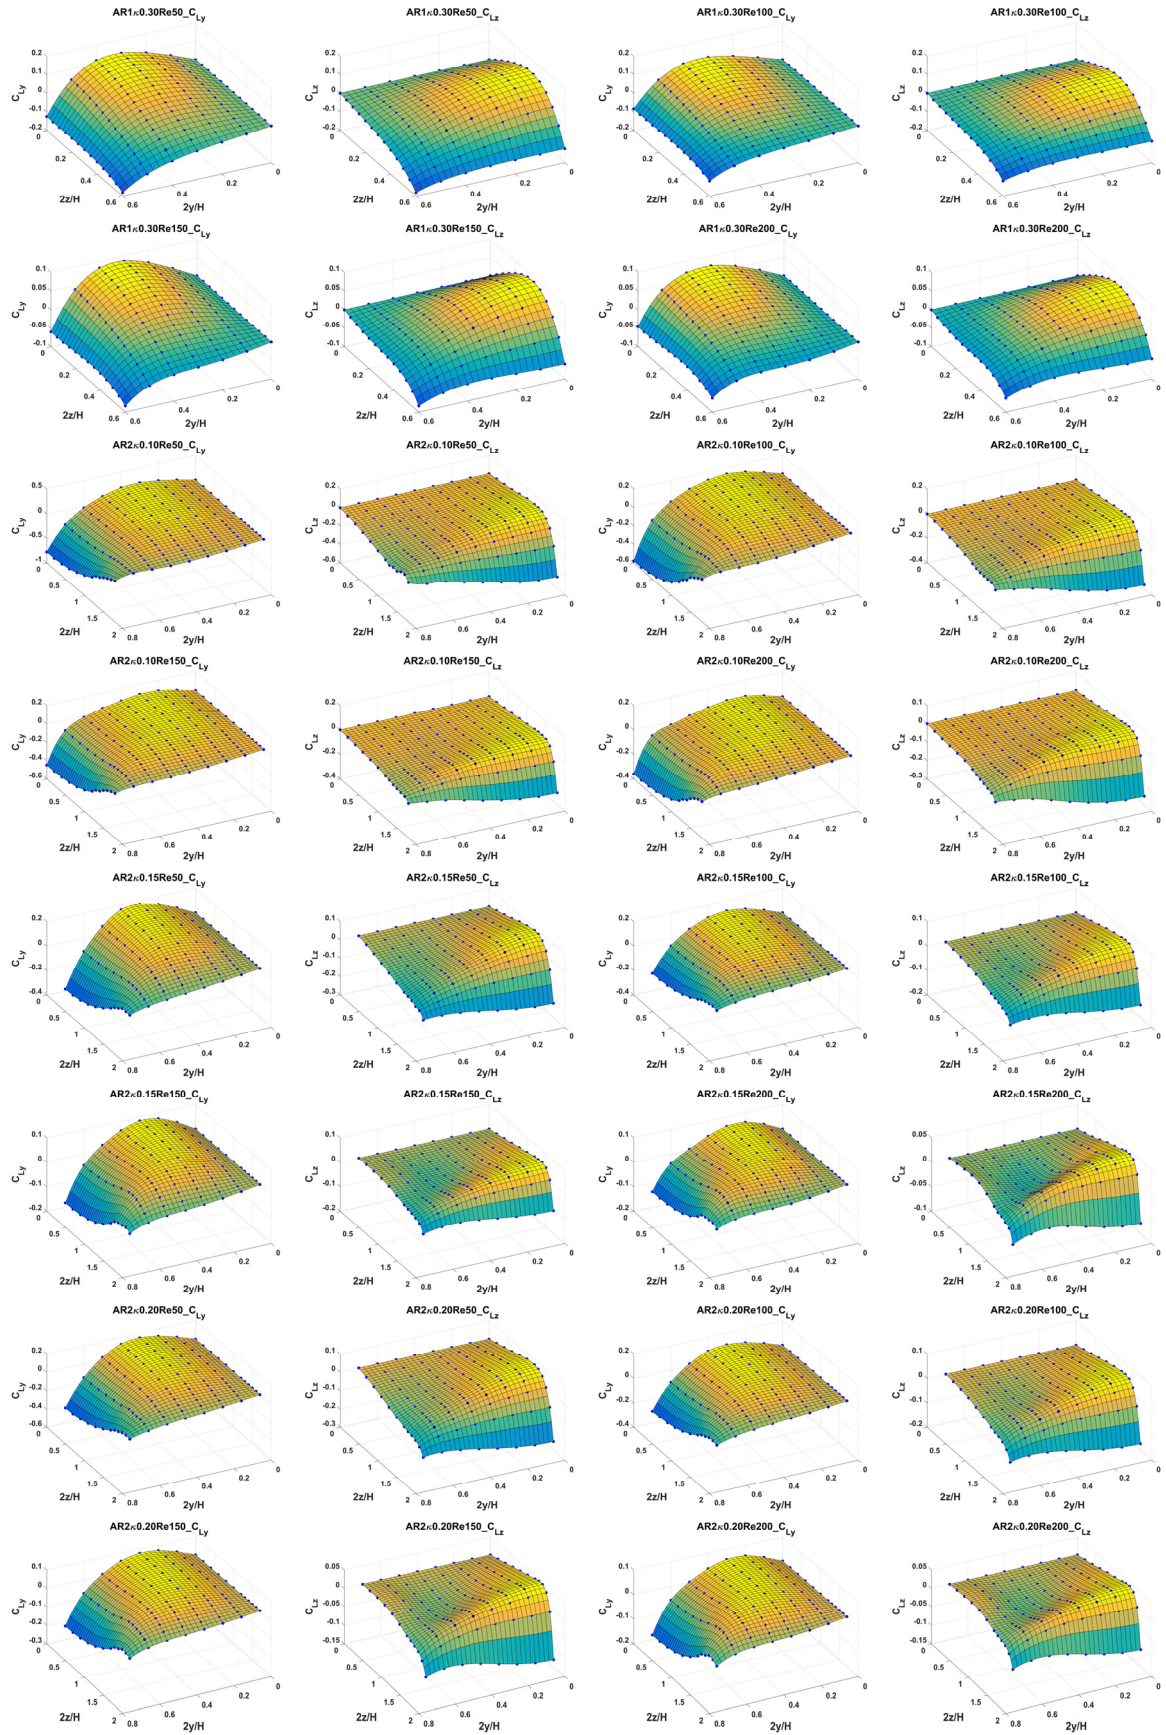

continue

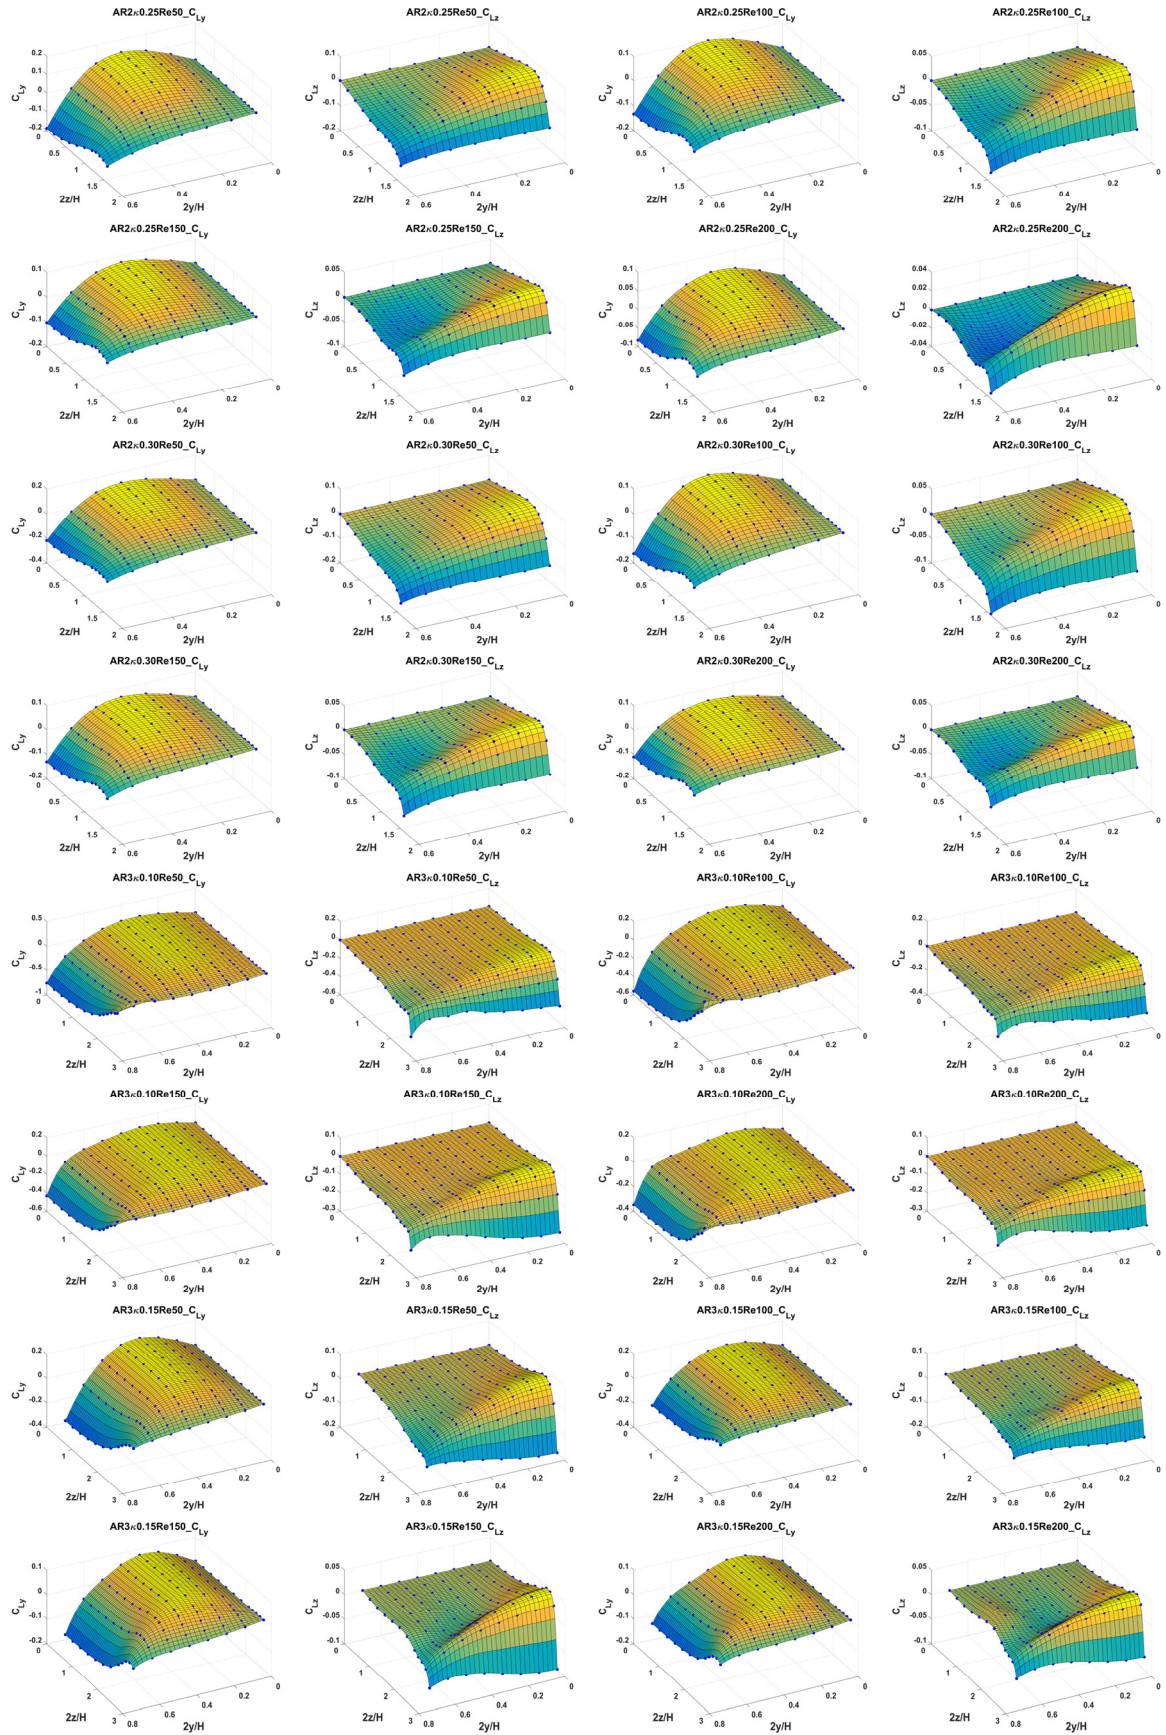

continue



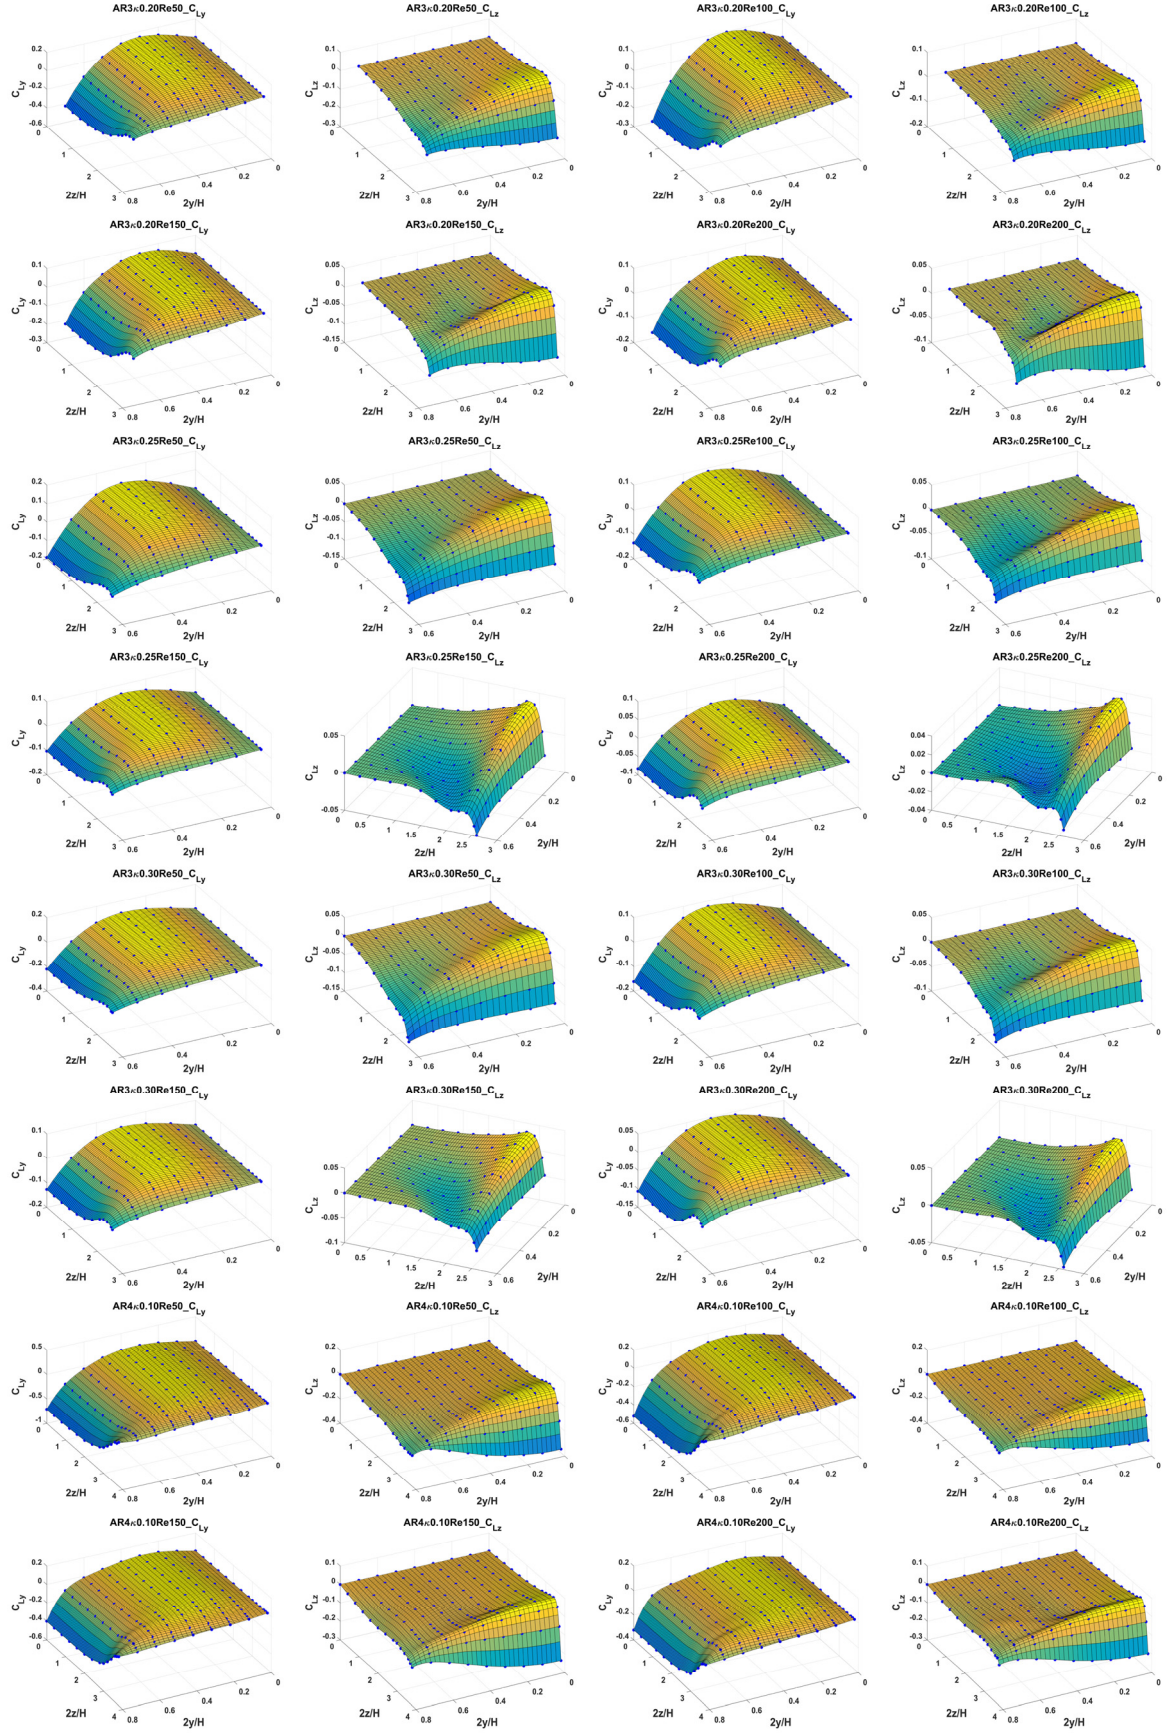

continue

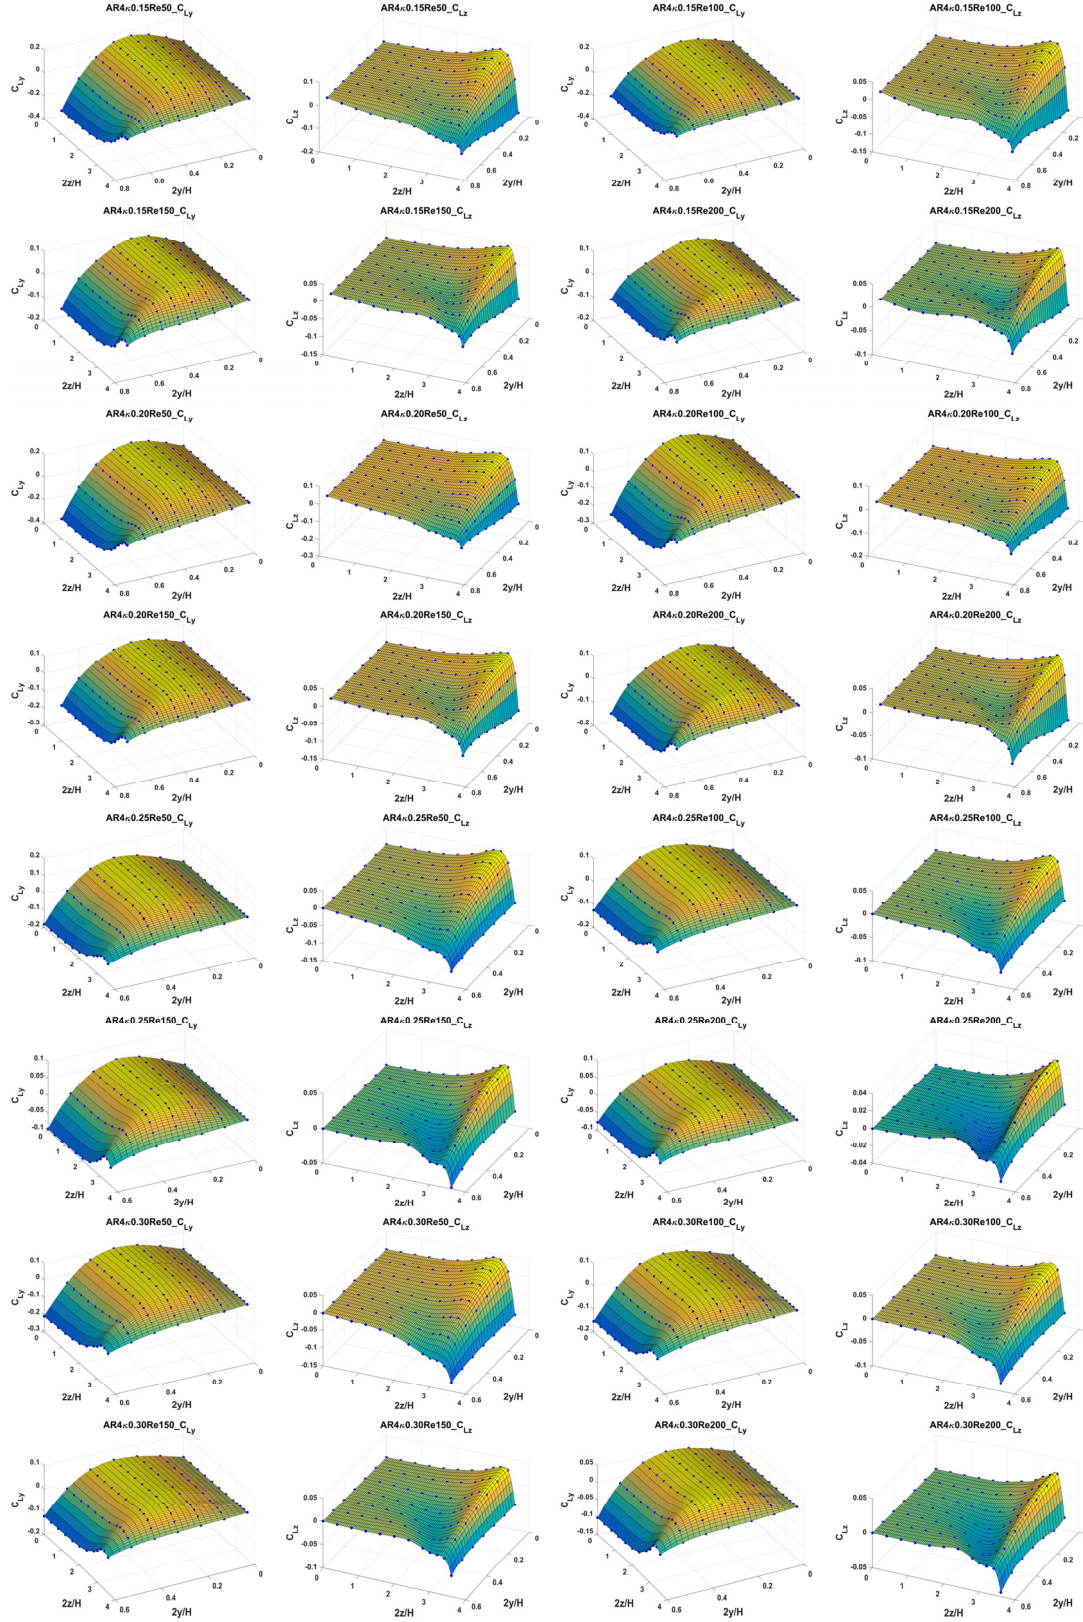

**Figure S1.** Distributions of the inertial lift coefficient components in quarter of channel cross-sections with the lift data in the database marked by blue dots.



We here set the coordinate of system as  $(x_1, x_2, x_3)$ , the direction of  $x_3$  as the direction of height and the coordinate of channel center axis as  $(x_{1\_axis}, x_{2\_axis}, x_{3\_axis})$ . In each  $x_1 - x_2$  plane, the radius of medium curvature is  $R$  and the center of curvature is  $(x_{1c}, x_{2c})$ . We can map the inertial lift  $(Fx_1, Fx_2, Fx_3)$  by following method.

$$Fx_1 = \frac{(x_1 - x_{1\_axis})}{abs(Rn)} \cdot C_{Lz}(abs(2(x_3 - x_{3\_axis}) / H), abs(2Rn / H)) \cdot \rho U_{\max}^2 a^2 \kappa^2 \quad (b1)$$

$$Fx_2 = \frac{(x_2 - x_{2\_axis})}{abs(Rn)} \cdot C_{Lz}(abs(2(x_3 - x_{3\_axis}) / H), abs(2Rn / H)) \cdot \rho U_{\max}^2 a^2 \kappa^2 \quad (b2)$$

$$Fx_3 = \frac{x_3 - x_{3\_axis}}{abs(x_3 - x_{3\_axis})} \cdot C_{Ly}(abs(2(x_3 - x_{3\_axis}) / H), abs(2Rn / H)) \cdot \rho U_{\max}^2 a^2 \kappa^2 \quad (b3)$$

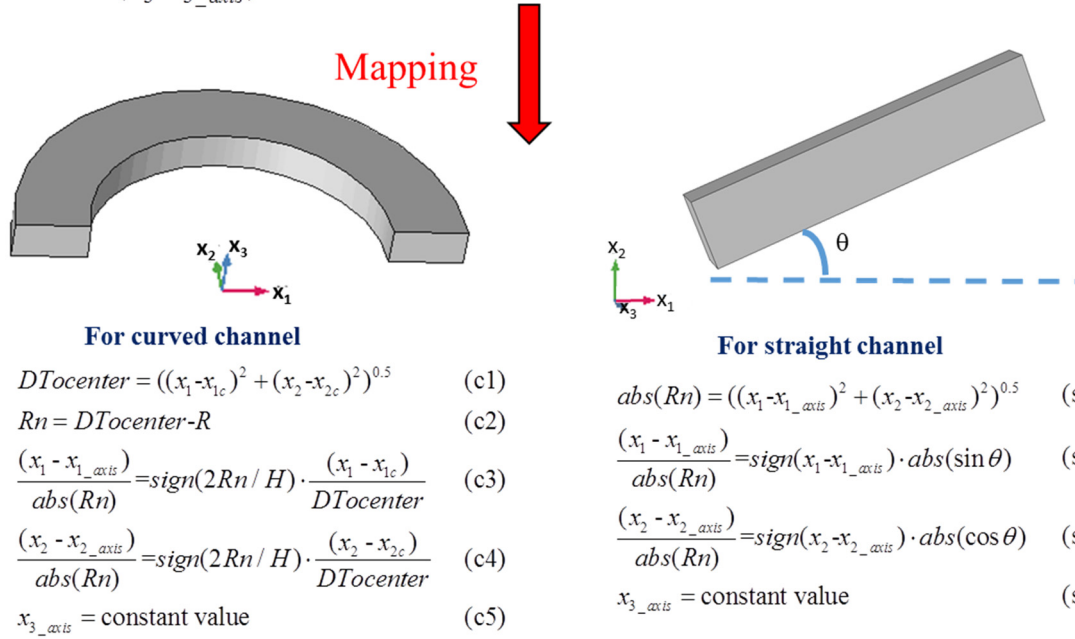

**Figure S2.** Mapping method for two types of channels: curved channel with constant radius and straight channel with a tilt angle varying from 0 to  $\pi$ .

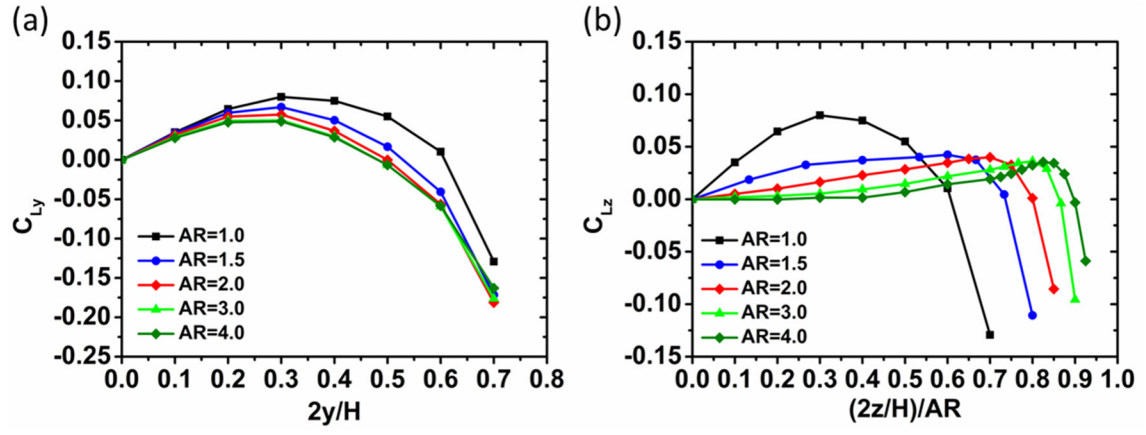

**Figure S3.**  $C_{Ly}$  along the short axis (a) and  $C_{Lz}$  along the long axis (b) with  $Re = 200$  and  $\kappa = 0.2$  at different  $AR$ .

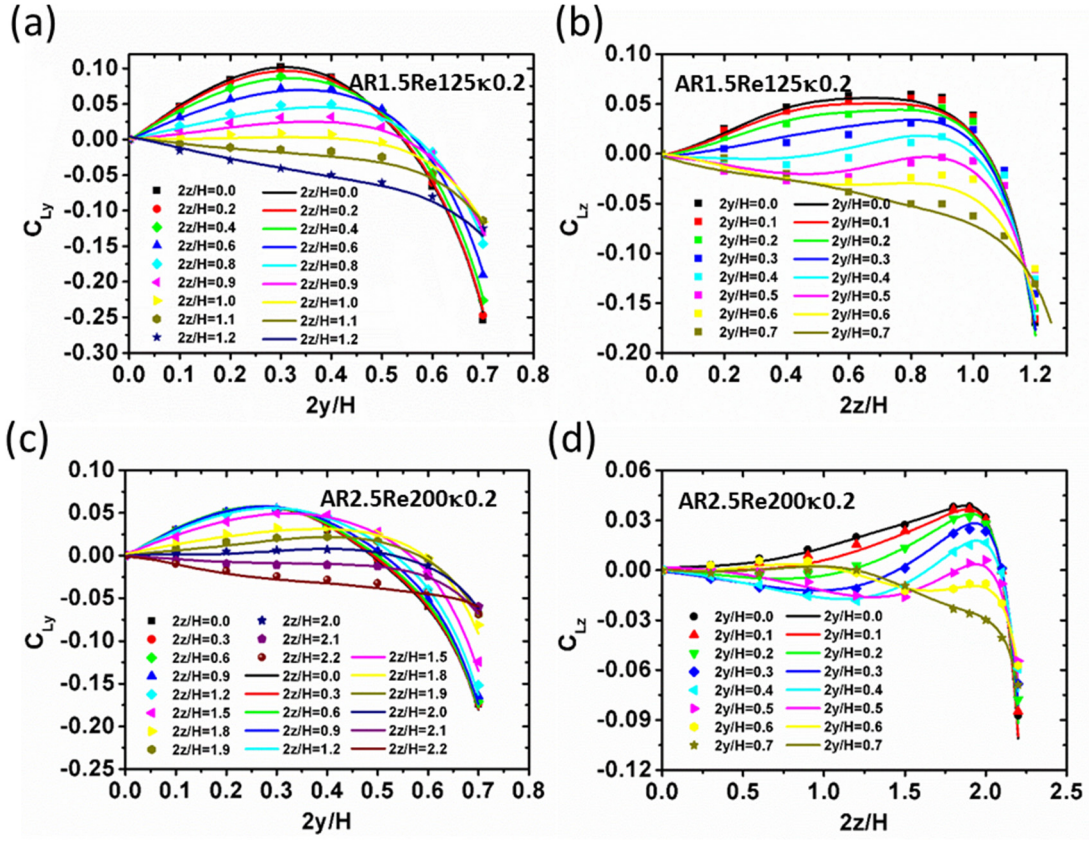

**Figure S4.** Comparisons between the inertial lift forces from the direct numerical simulations (symbols) and the ANN predictions (lines).
